# Supplementary material for: Removal of Malachite Green from water using hydrothermally carbonized pine needles
Source: Royal Society of Chemistry journal article supplement (doi:10.1039/c4ra15505j), 2014-12-22
Supplement: c4ra15505j1.pdf [file c4ra15505j1.pdf]

Table SI 1. Comparison of MG adsorption capacity of HTC materials with other reported adsorbents.

| Sorbent                                | $q_{\max}$ (mg/g) | Reference  |
|----------------------------------------|-------------------|------------|
| Degreased coffee bean                  | 55.3              | [57]       |
| Deoiled Soya                           | 51.91             | [25]       |
| Modified rice husk                     | 15.49             | [47]       |
| Rattan sawdust                         | 62.7              | [5]        |
| Rubber wood sawdust                    | 36.45             | [58]       |
| Treated sawdust                        | 65.8              | [59]       |
| Sea shell powder                       | 42.33             | [24]       |
| Ca(OH) <sub>2</sub> -treated fly Ash   | 17.38             | [22]       |
| Waste apricot Activated carbon         | 116.27            | [60]       |
| Rice husks activated carbon            | 92.59             | [23]       |
| Laboratory grade activated carbons     | 42.18             | [61]       |
| Groundnut shell waste activated carbon | 222.22            | [62]       |
| HTC-PN                                 | 52.91             | This study |
| HTC-APN                                | 97.08             | This study |

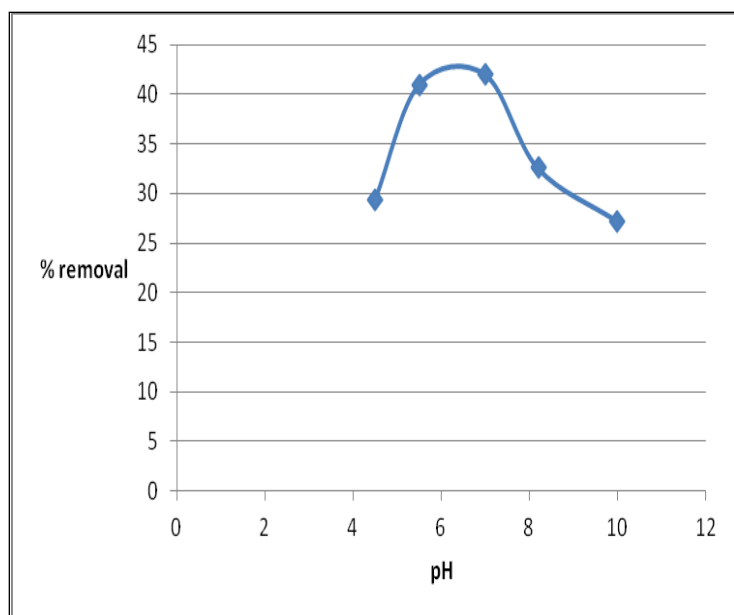

Figure SI 1. Effect of pH on percent removal of MG from aqueous solution onto HTC-PN.

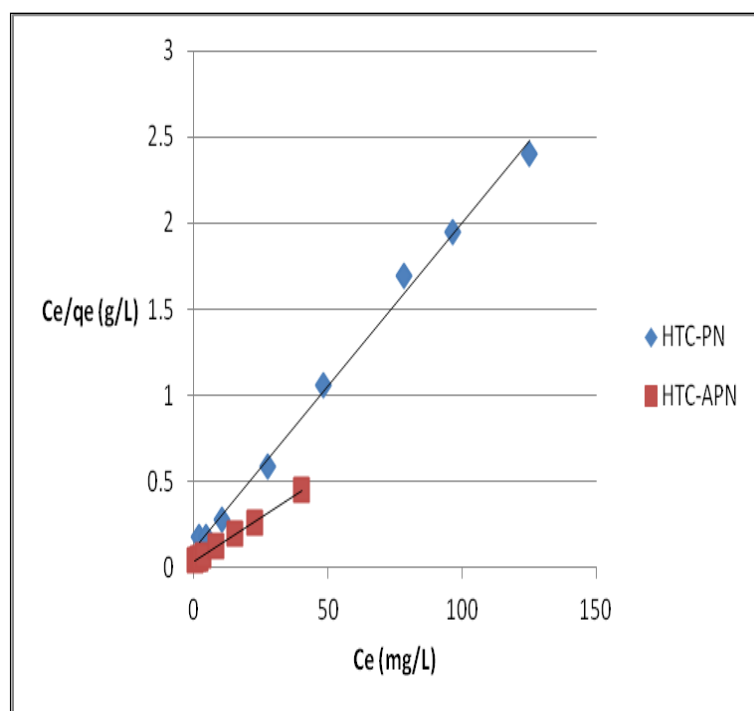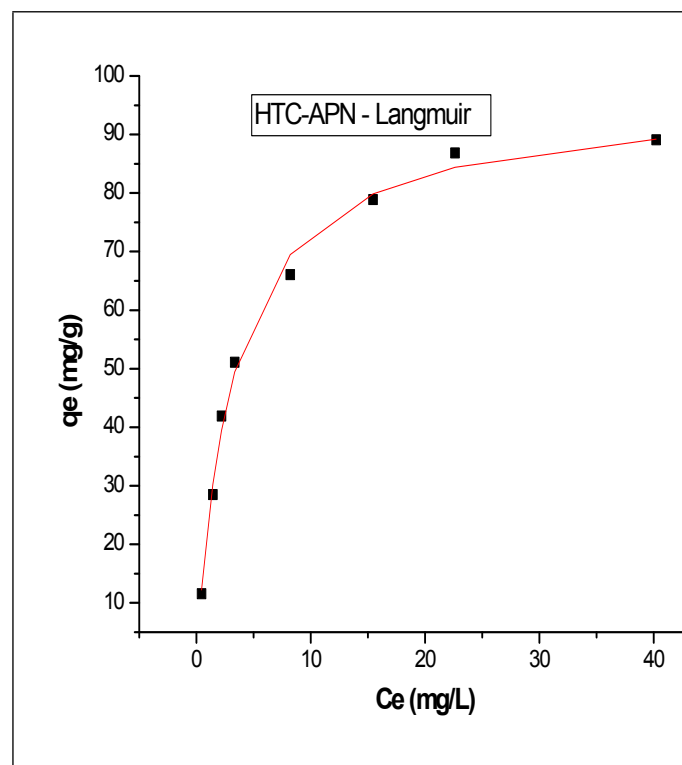

Figure SI 2. Langmuir nonlinear plot for HTC-APN at 30 °C.

Figure SI 3. Langmuir linear plot for HTC-PN and HTC-APN at 30°C.

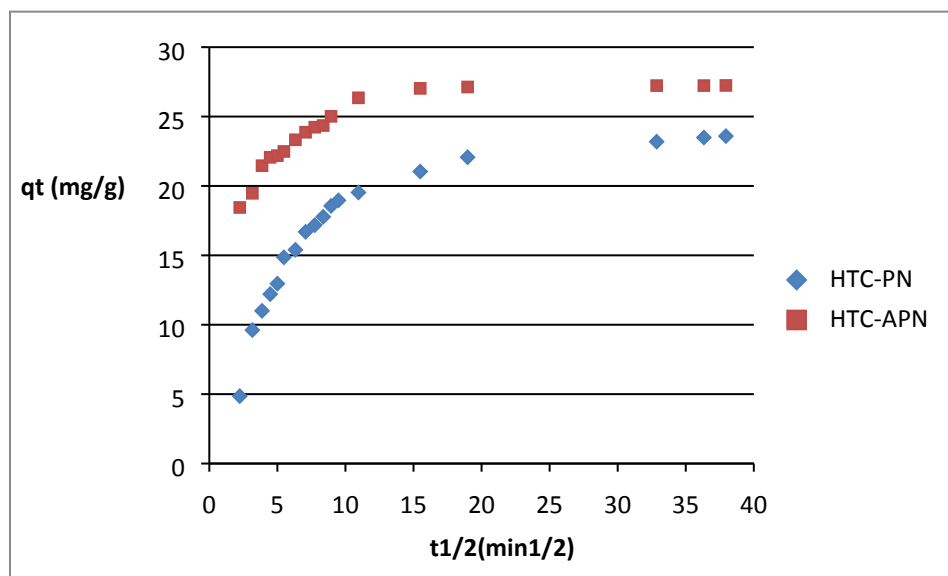

Figure SI 4. Intraparticle kinetic plot for adsorption of MG onto HTC-PN and HTC-APN at 35 °C.

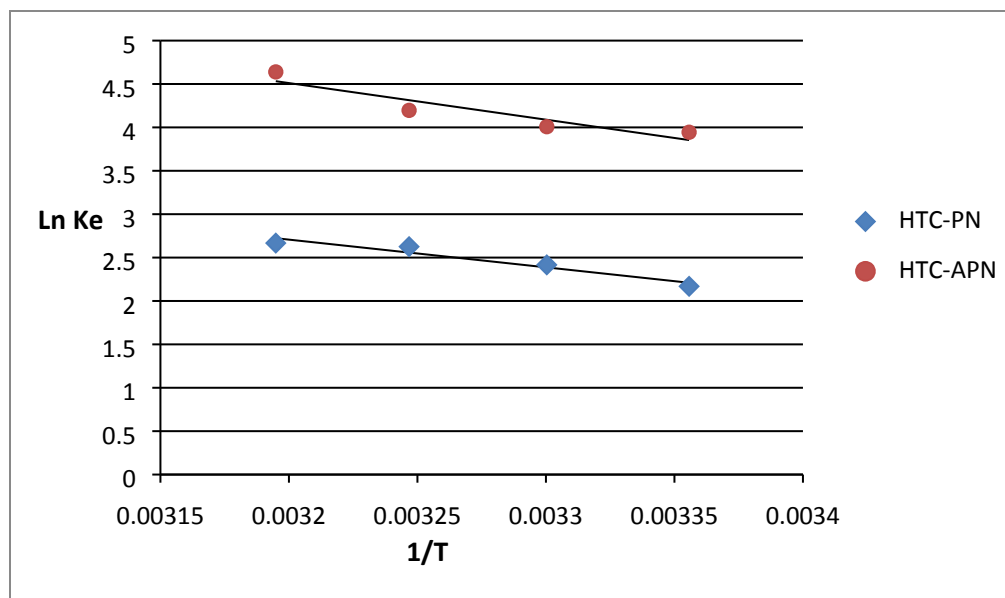

Figure SI 5. Van't Hoff plot of  $\ln K_e$  vs  $1/T$  for adsorption of MG (50 mg/L) with HTC-PN and HTC-APN materials.

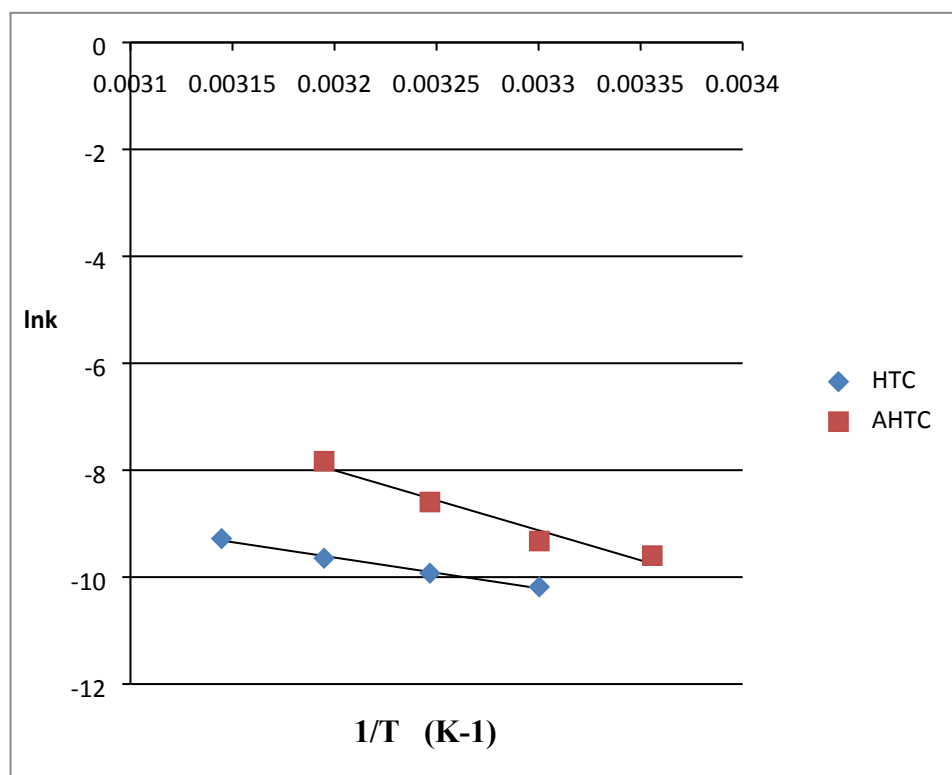

Figure SI 6. Arrhenius plot of  $\ln k_2$  vs  $1/T$  for adsorption of MG (50 mg/L) with HTC-PN (HTC) and HTC-APN (AHTC) materials.

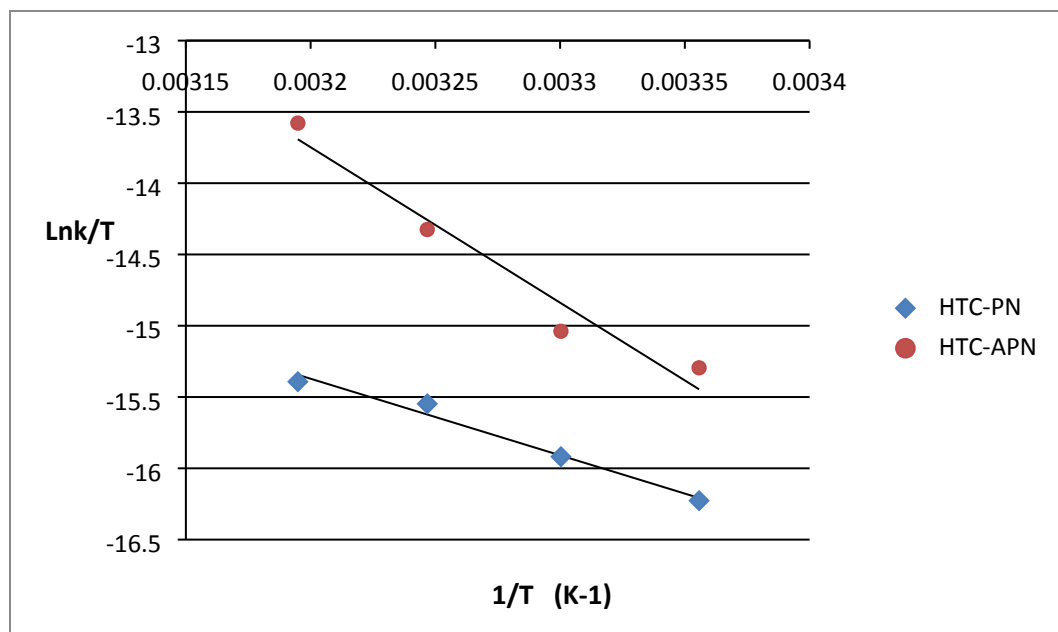

Figure SI 7. Eyring plot of  $\ln k_2/T$  vs  $1/T$  for adsorption of MG with HTC-PN and HTC-APN materials.

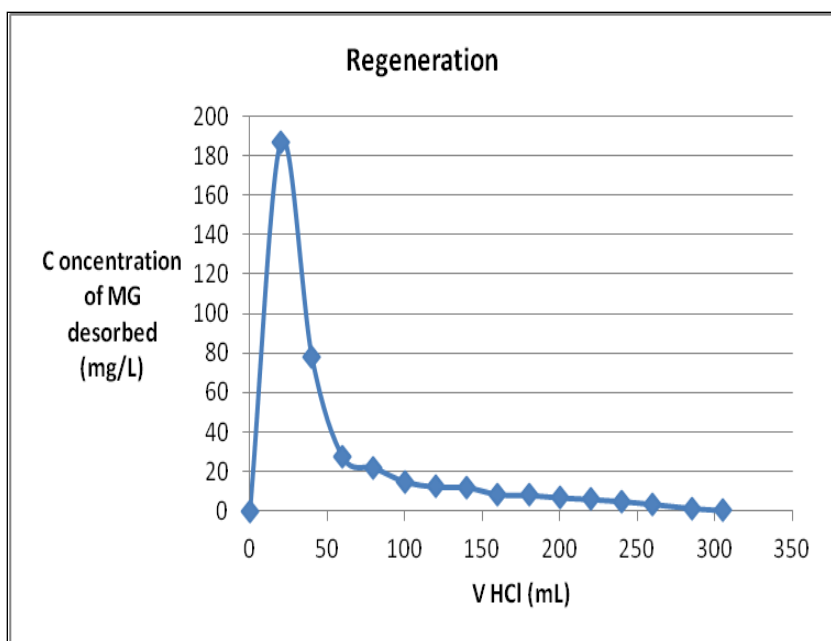

Figure SI 8. First cycle desorption profile of MG (100 mg/L) onto column charged with HTC-APN (0.5 g).

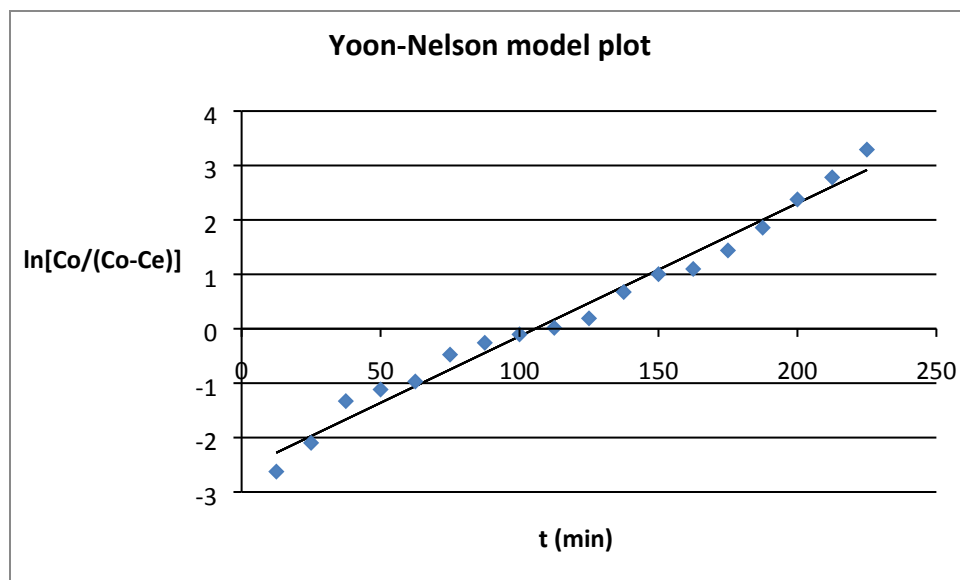

Figure SI 9. Yoon-Nelson linear plot. The points are experimental data, solid line is predicted by Yoon Nelson Model.
